# Supplementary material
Source: publisher figshare collection journal article supplement (https://becaris.figshare.com/articles/dataset/_/25746369)
Supplement: Supplementary file 1 [file 1]

Supplementary materials

Figure 1. A) Overall survival hazard plots in evidence network for the pooled Checkmate 017-057 trials comparing nivolumab with docetaxel. B) Keynote 010 trial comparing pembrolizumab with docetaxel, C) POPLAR trial comparing atezolizumab with docetaxel, D) OAK trial comparing atezolizumab with docetaxel

**A)**


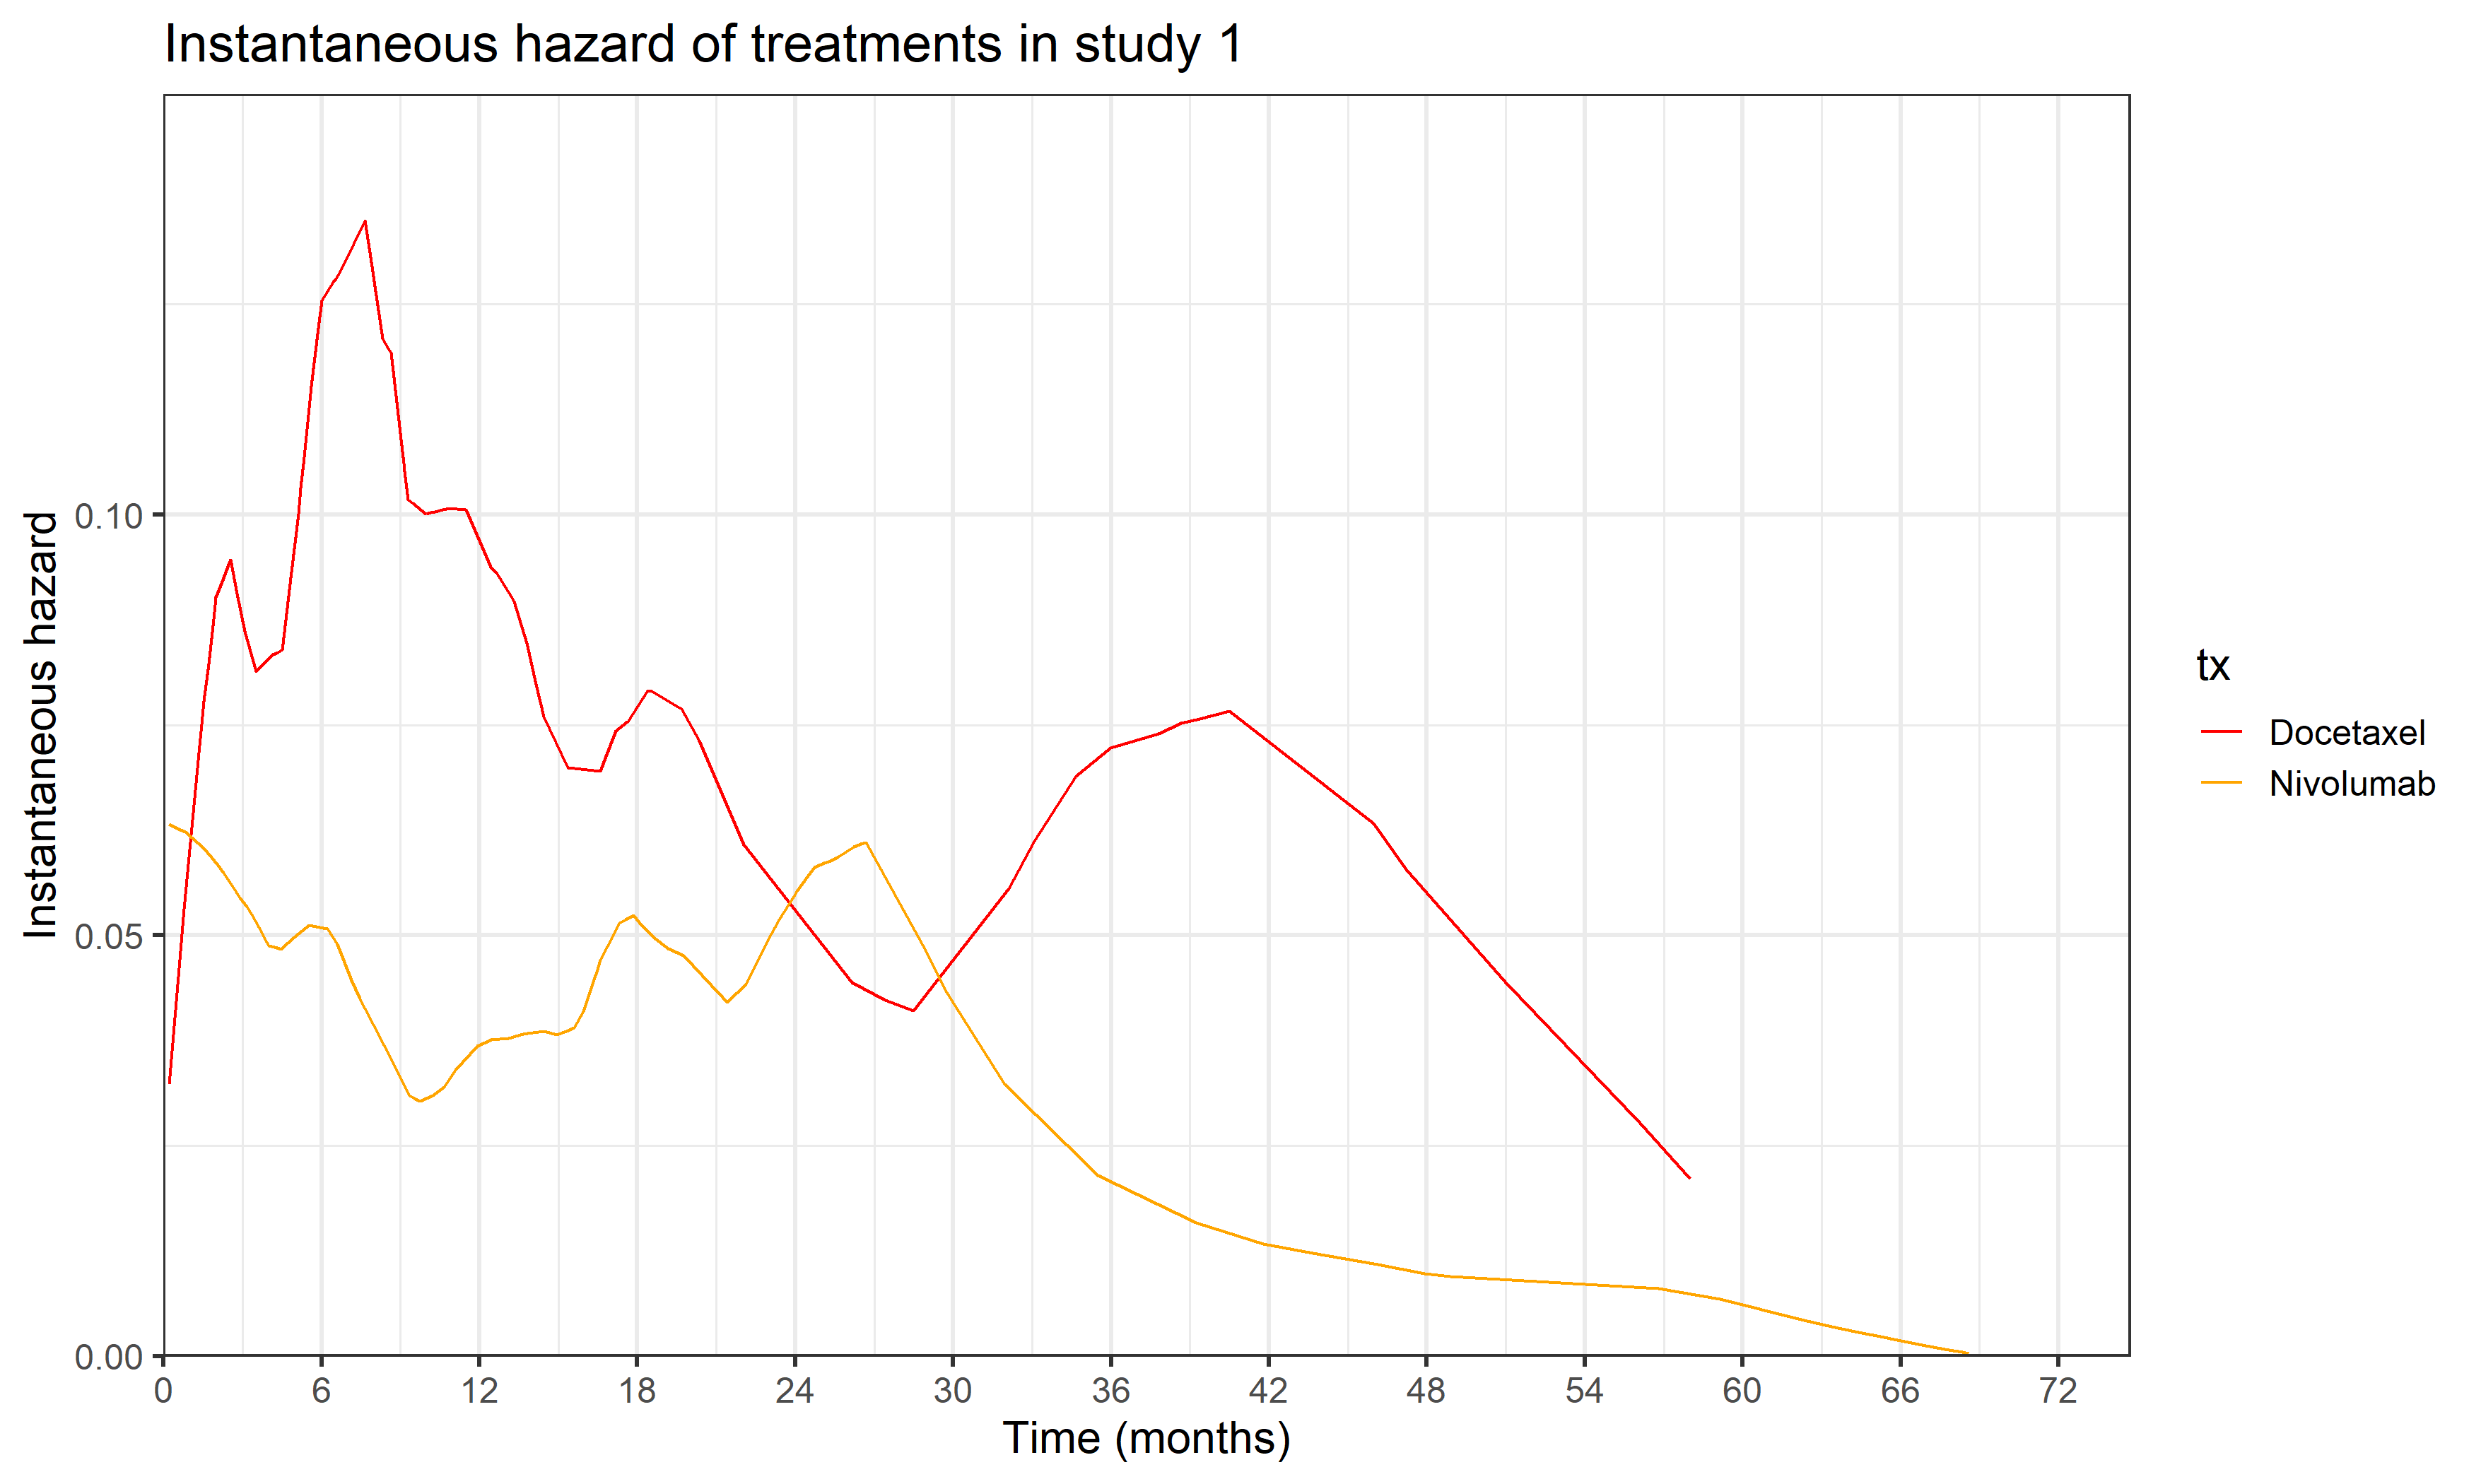


**B)**


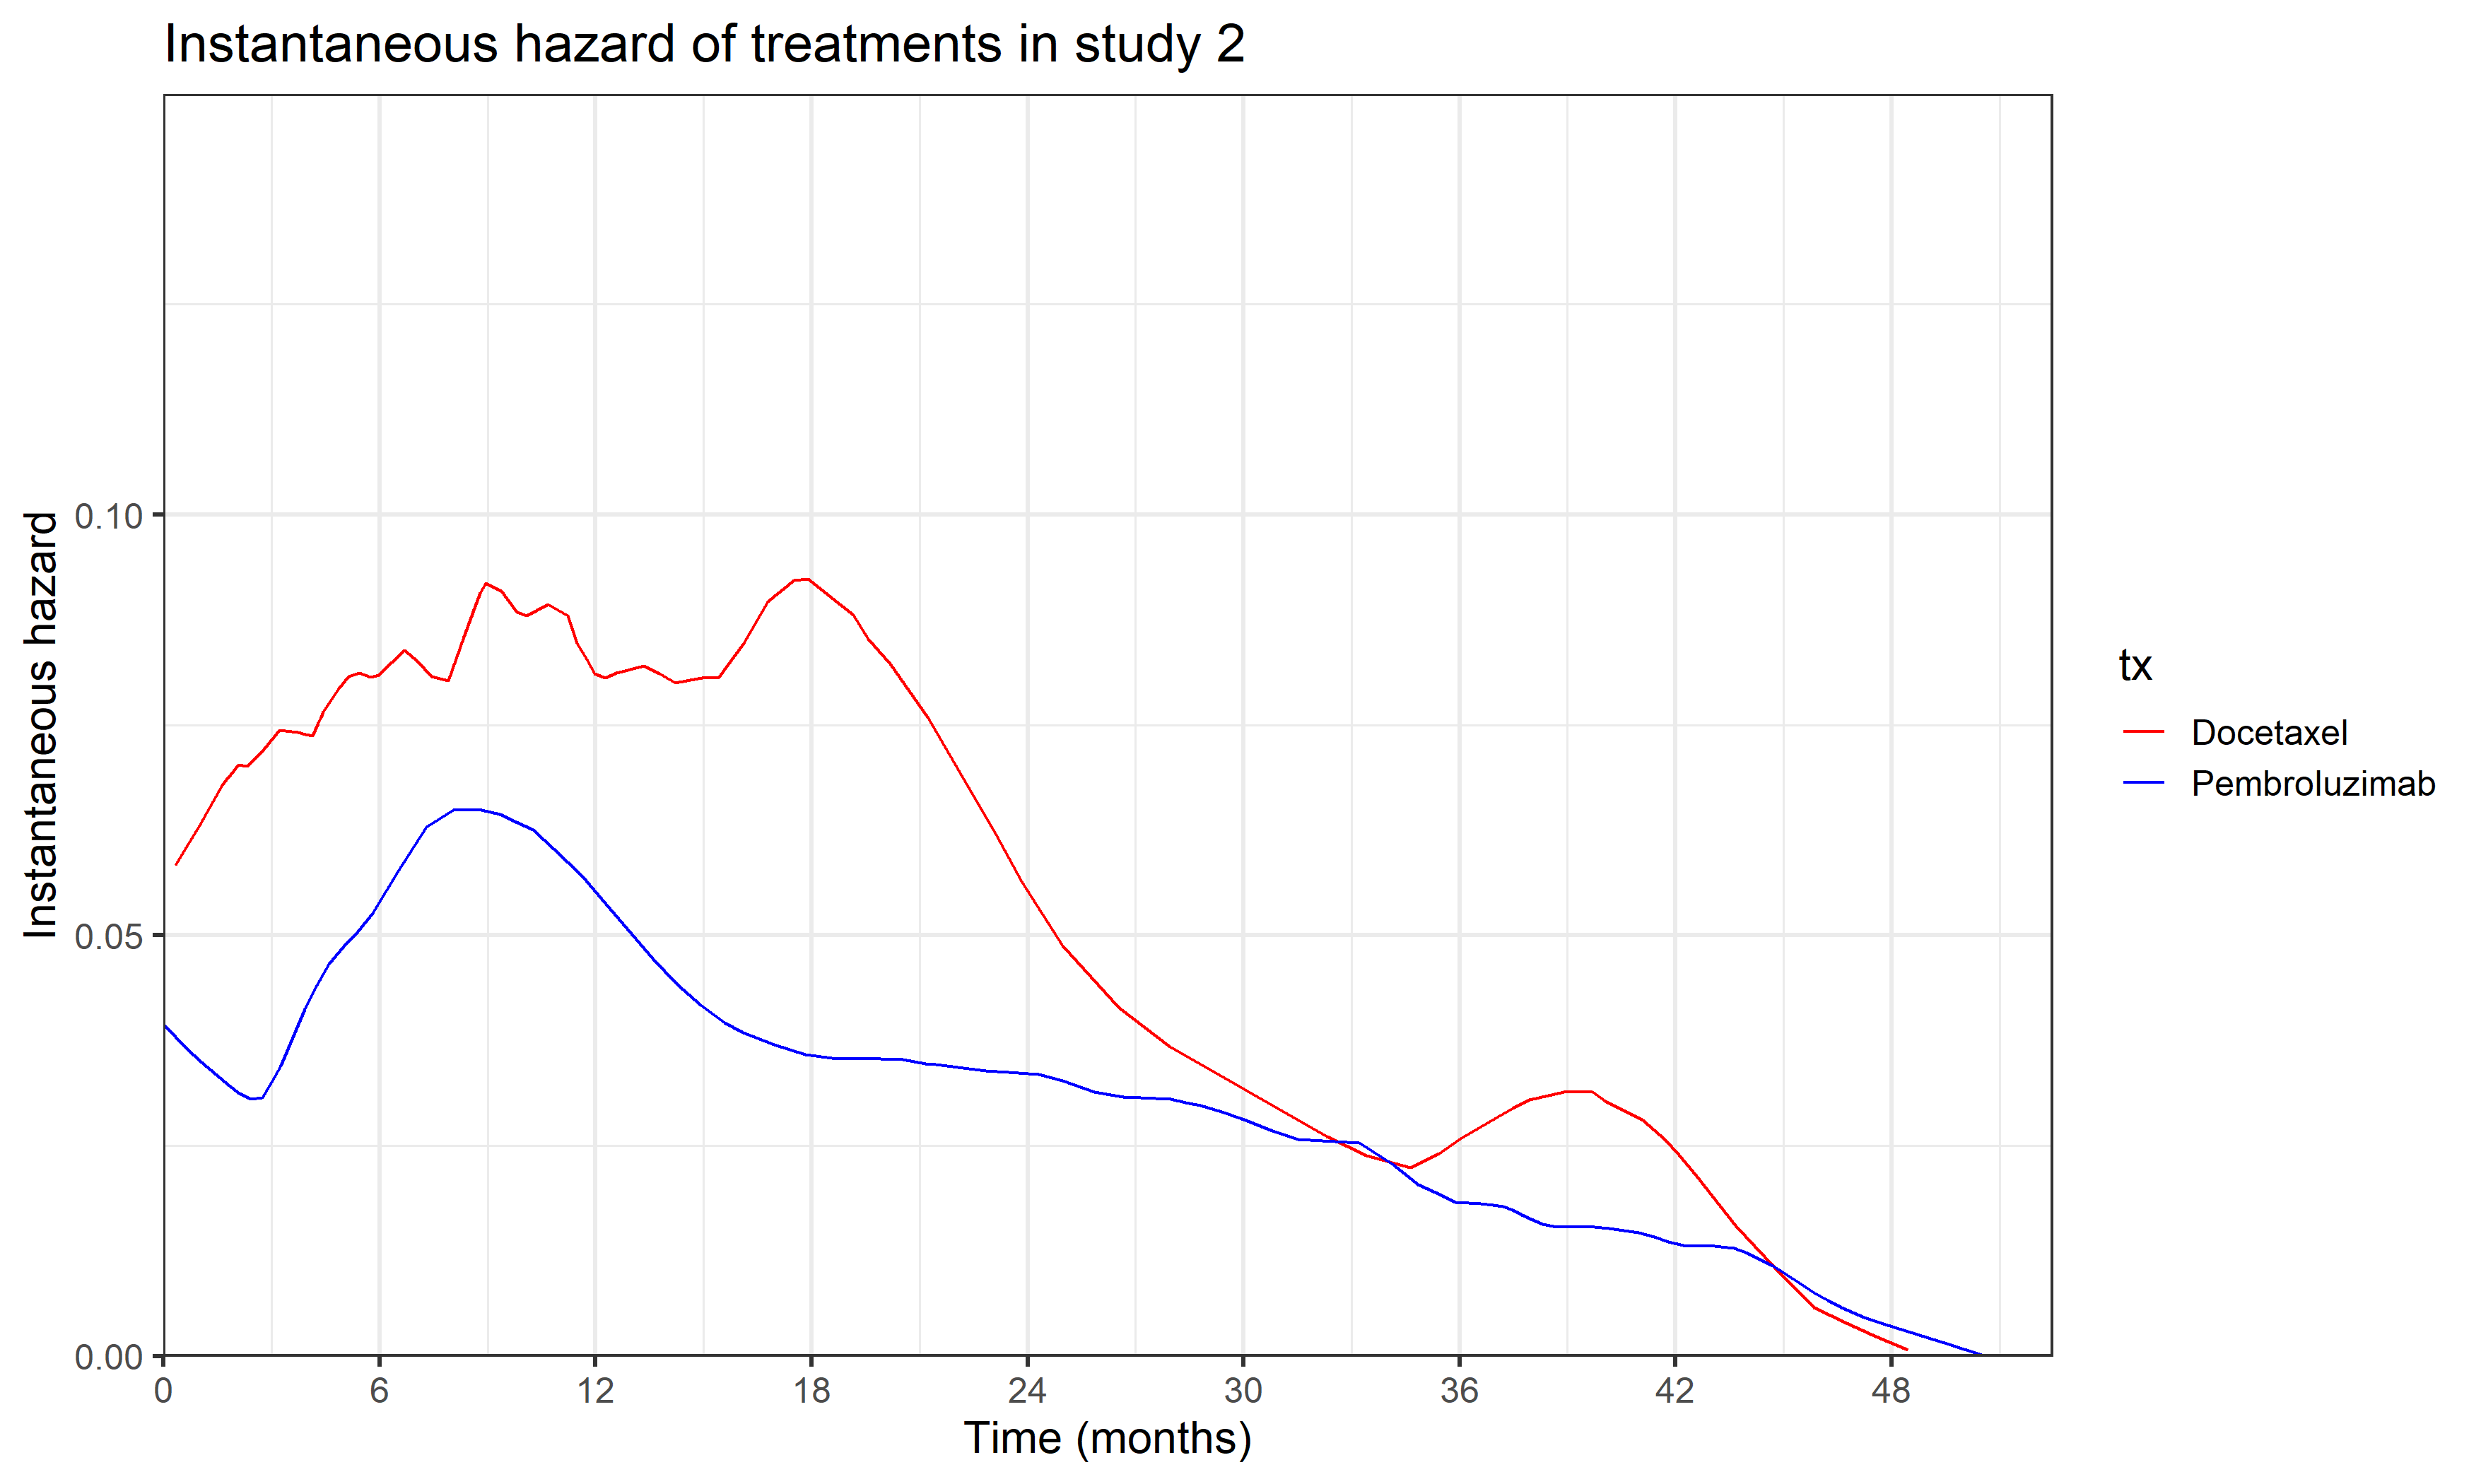


**C)**


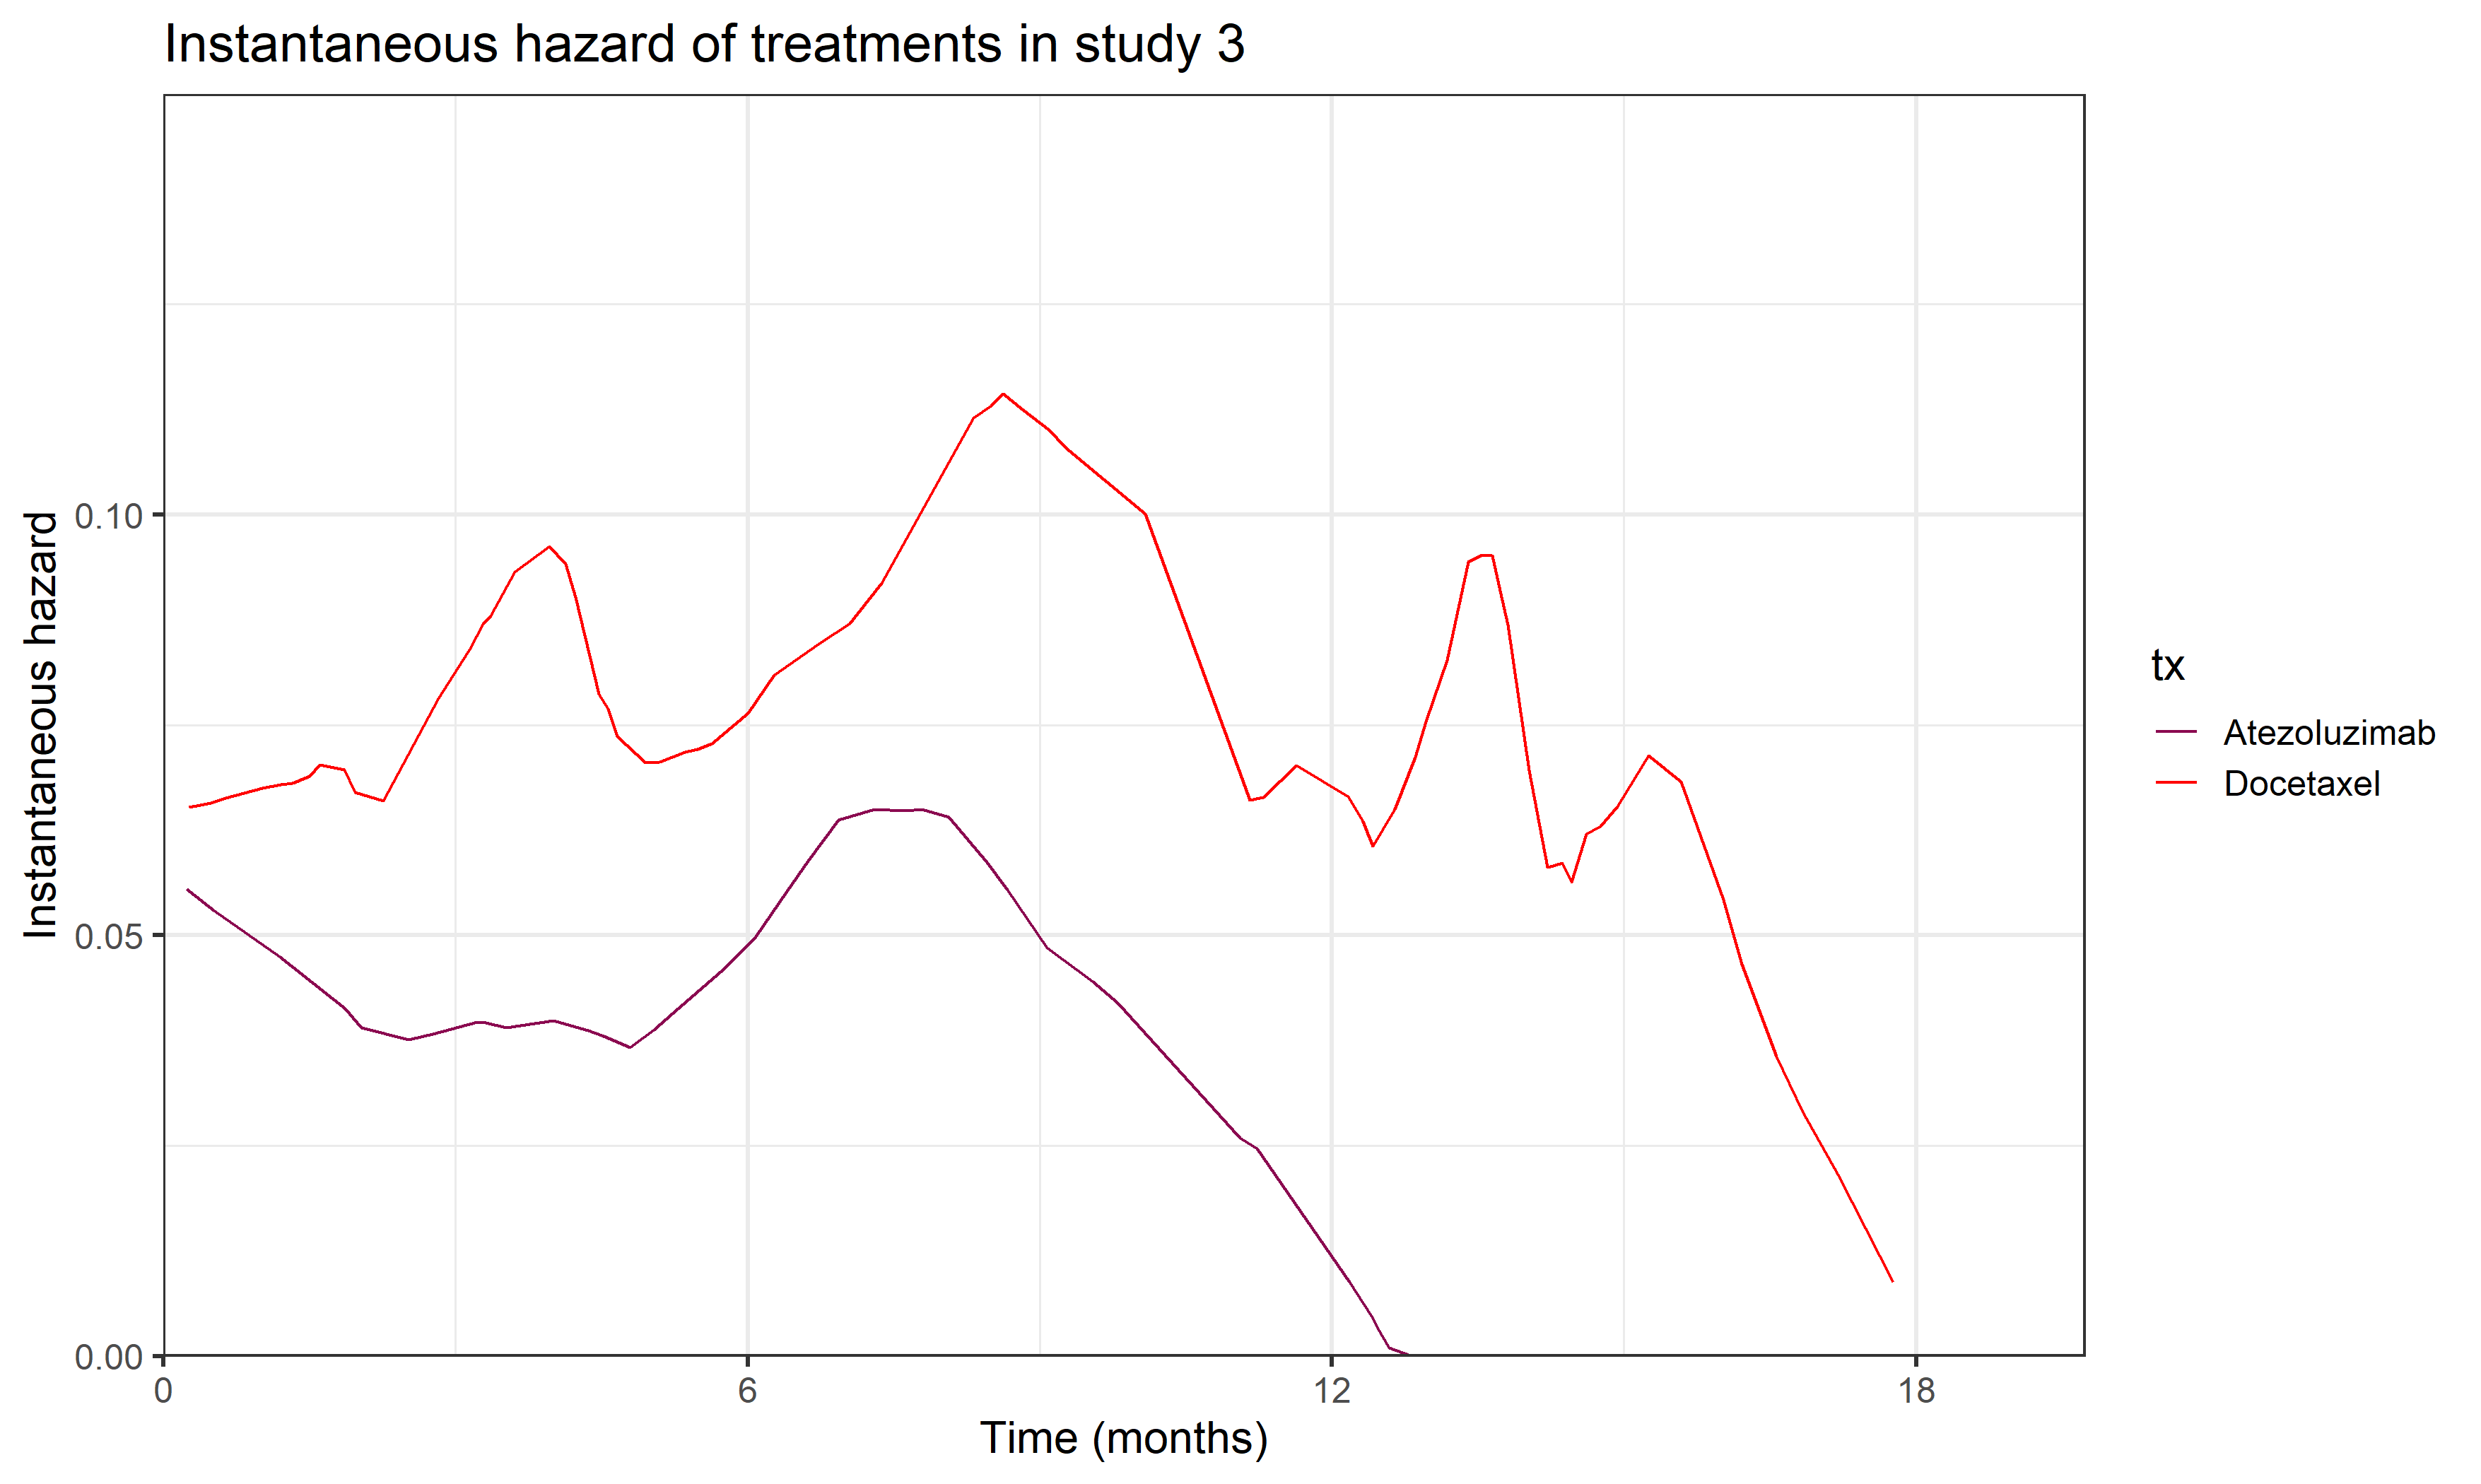


**D)**


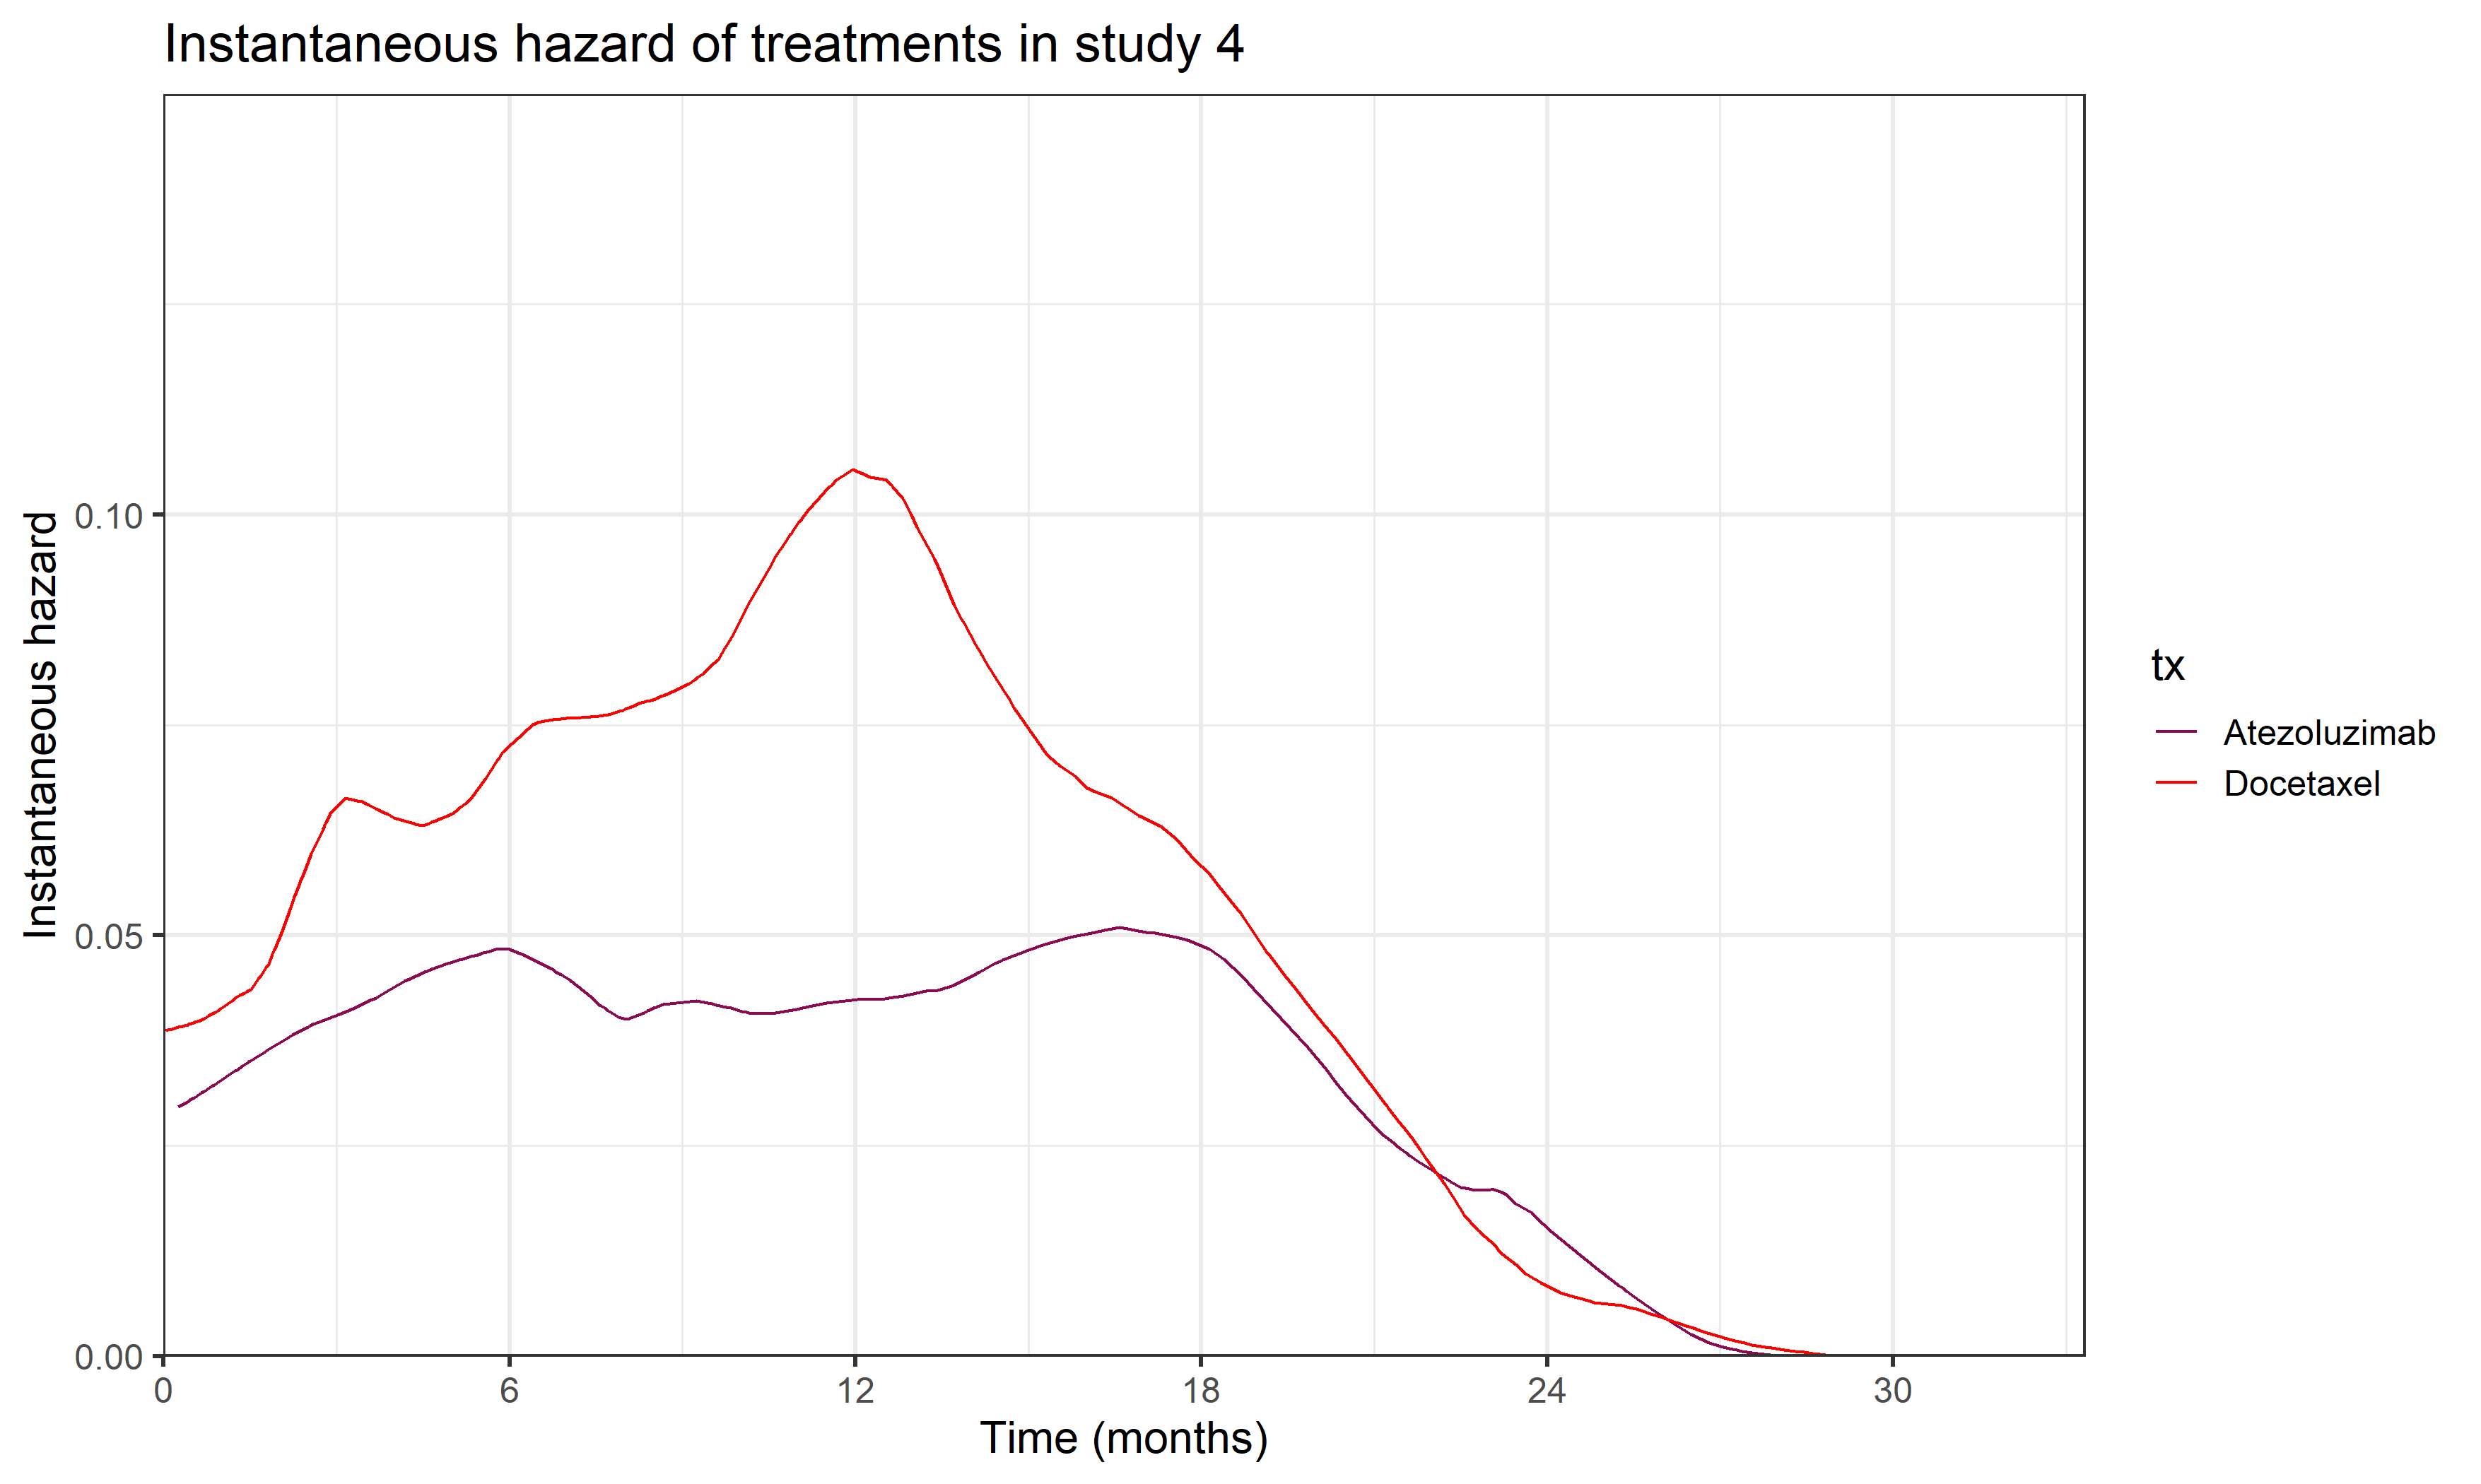


Figure 2. Network of evidence

**A)**


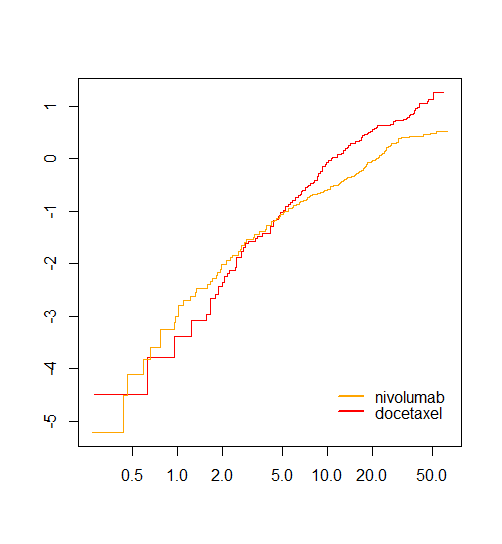

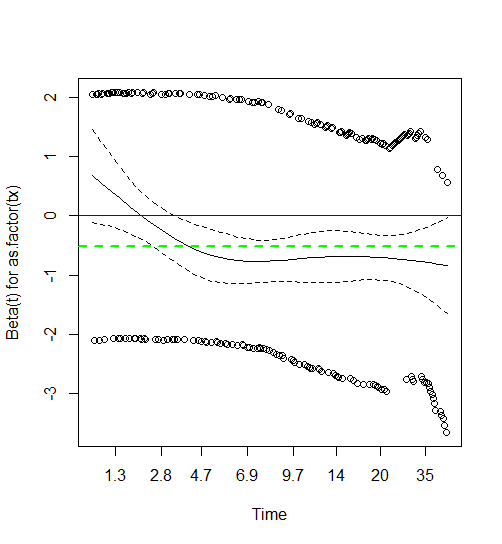


P<0.0076 (Schoenfeld test)

**B)**


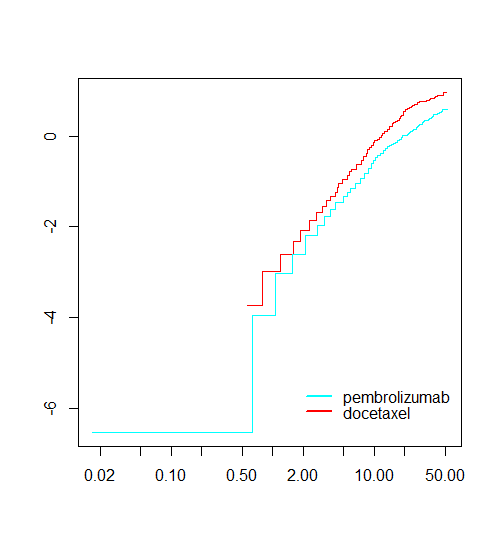

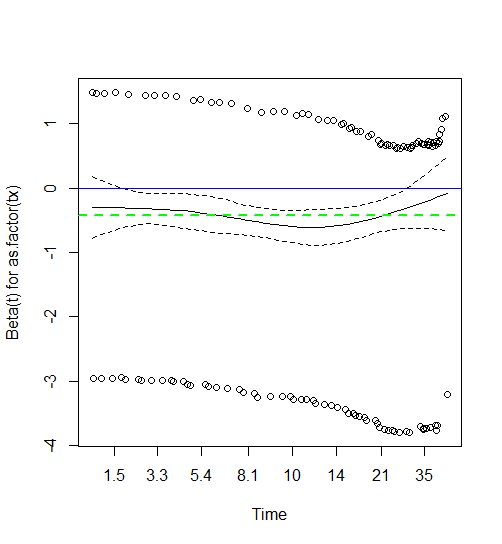


P=0.69 (Schoenfled test)

**C)**


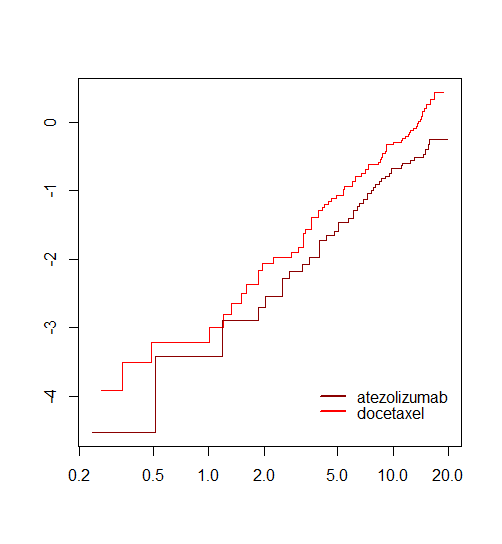

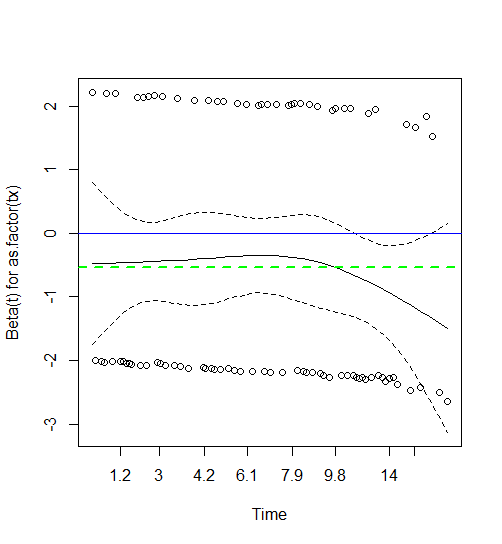


P=0.37 (Schoenfled test)

**D)**


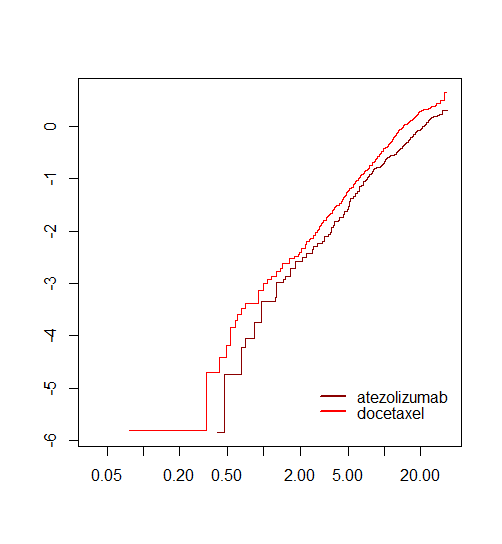

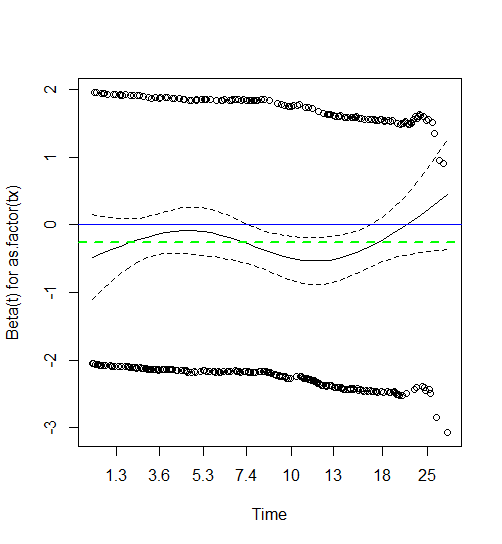


P=0.85 (Schoenfled test)

Figure 3. Log cumulative hazard plots and Schoenfeld plots for A) pooled checkmate 017 and 057 trials, Keynote 010; C) POPLAR D) OAK

Figure 4 Predicted survival best fitting reduced models and corresponding 95% credible interval on therapy with longest predicted survival; A) loglogistic standard parametric, B) loglogistic piecewise, C) loglogistic spline, D) Loglogistic non-mixture cure, E) loglogistic mixture cure and F) Weibull mixture, G) second order Fractional polynomial.

|  |  | Times (months) |
| --- | --- | --- |
|  | time first event (exp(kmin) | 0.017 |
| Percentiles | 25% | 3.998 |
| 33% | 5.119 |
| 50% | 8.126 |
| 66% | 11.748 |
| 75% | 14.682 |
|  | time last event (exp(kmax)) | 68.581 |

Table 1 Overview of the percentiles related to placements of knots and the corresponding uncensored survival times in the considered NMA dataset.

Table 2. LOOICs of fully specified (treatment effects on all parameters) survival network meta-analysis.

| **Model** | **Number** | **Distribution** | **Full model LOOIC** | **Reduced model LOOIC** |
| --- | --- | --- | --- | --- |
| PNMA | 1 | exponential | 13,599 |  |
| 2 | Gompertz | 13,504 |  |
| 3 | **loglogistic** | **13,435** | **13,433** |
| 4 | lognormal | 13,448 |  |
| 5 | Weibull | 13,577 |  |
| Piecewise | 6 | exponential | 13,570 |  |
| 7 | Gompertz | 13,457 |  |
| 8 | **loglogistic** | **13,427** | **13,422** |
| 9 | lognormal | 13,457 |  |
| 10 | Weibull | 13,458 |  |
| Spline | 11 | Gompertz | 13,457 |  |
| 12 | log_hazard | 13,447 |  |
| 13 | **loglogistic** | **13,436** | **13,431** |
| 14 | Lognormal | 13,445 |  |
| 15 | Weibull | 13,440 |  |
| Mixture cure | 16 | exponential | 13,487 |  |
| 17 | Gompertz | 13,489 |  |
| 18 | **loglogistic** | **13,434** | **13,434** |
| 19 | lognormal | 13,448 |  |
| 20 | Weibull | 13,462 |  |
| Non mixture cure | 21 | exponential | 13,501 |  |
| 22 | Gompertz | 13,493 |  |
| 23 | **loglogistic** | **13,436** | **13,434** |
| 24 | lognormal | 13,437 |  |
| 25 | Weibull | 13,442 |  |
| Mixture | 26 | exponential | 13,492 |  |
| 27 | Gompertz | 13,460 |  |
| 28 | loglogistic | 13,438 |  |
| 29 | lognormal | 14,026 |  |
| 30 | **Weibull** | **13,436** | **13,426** |
| Fractional polynomial | 31 | First order | 13,590 |  |
| **32** | **Second order** | **13,499** | **13,492** |
| 33 | Repeated powers | 13,499 |  |
| 34 | Logarithmic | 13,503 |  |
